# Supplementary material for: Winter-to-summer transition of Arctic sea ice breakup and floe size distribution in the Beaufort Sea
Source: Oxford University Press journal article supplement (doi:10.1525/elementa.232), 2017-01-01
Supplement: elementa-5-232-s2.pdf [file elementa-5-232-s2.pdf]

**Figure S1. A sequence of TS-X SM images showing the transition of an ice floe.** The ice floe is marked with yellow dashed polygon, which has been broken apart during mid-August breakup (see Figure 15).

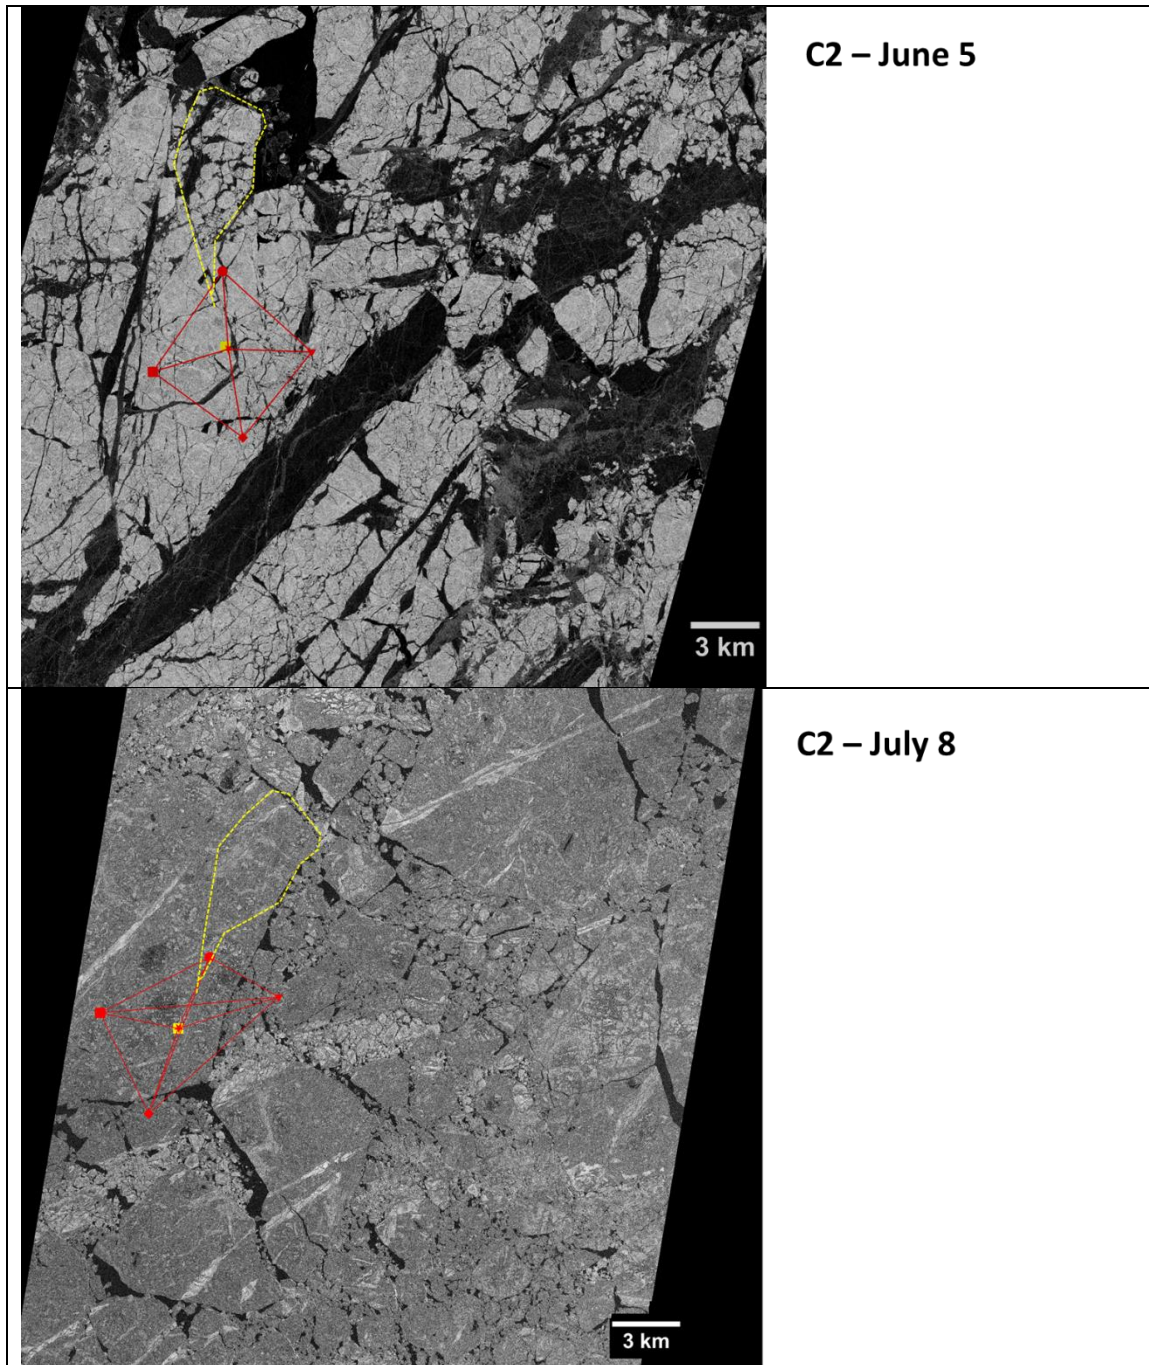

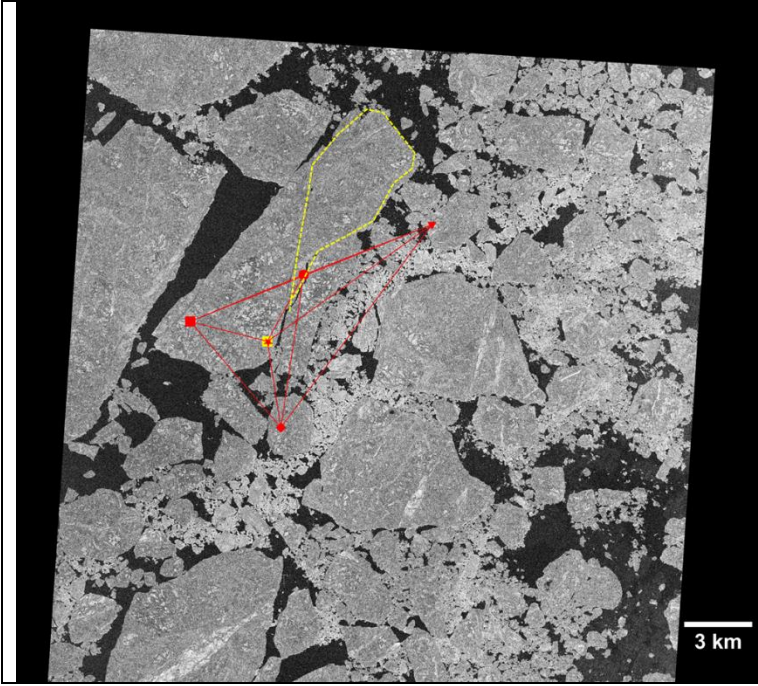

C2 – July 19
